# Supplementary material for: A Simultaneous and Continuous Excitation Method for High-Speed Electrical Impedance Tomography with Reduced Transients and Noise Sensitivity
Source: MDPI journal article supplement (doi:10.3390/s18041013), 2018-03-28
Supplement: s1 [file s1]

VOLTAGE SOURCE  $V$

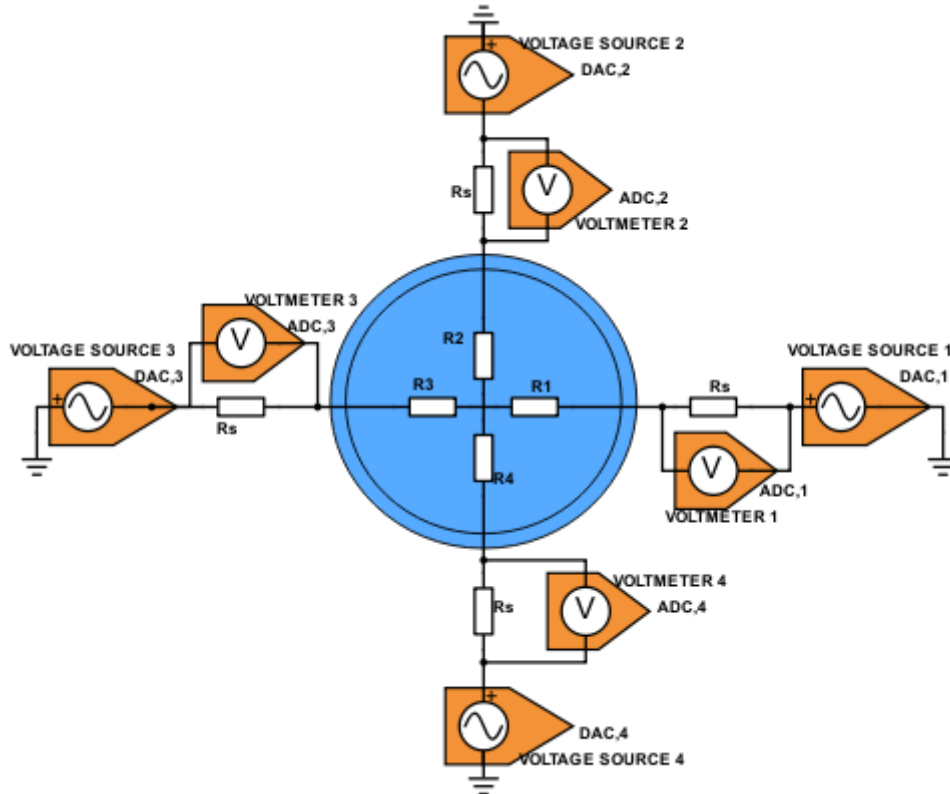

The 4 voltage sources generate the following signals:

$$\begin{aligned} V_1(t) &= +A_1^{\omega_1} \sin(\omega_1 t) + A_1^{\omega_2} \sin(\omega_2 t) + A_1^{\omega_3} \sin(\omega_3 t) \\ V_2(t) &= -A_1^{\omega_1} \sin(\omega_1 t) + A_2^{\omega_4} \sin(\omega_4 t) + A_2^{\omega_5} \sin(\omega_5 t) \\ V_3(t) &= -A_1^{\omega_2} \sin(\omega_2 t) - A_2^{\omega_4} \sin(\omega_4 t) + A_3^{\omega_6} \sin(\omega_6 t) \\ V_4(t) &= -A_1^{\omega_3} \sin(\omega_3 t) - A_2^{\omega_4} \sin(\omega_4 t) - A_3^{\omega_6} \sin(\omega_6 t) \end{aligned} \quad (1)$$

The voltage drop measurements across the sense resistors have 6 frequency components each:

$$\begin{aligned} U_1 &= \sum_{k=0}^6 U_1^{\omega_k} \sin(\omega_k t) \\ U_2 &= \sum_{k=0}^6 U_2^{\omega_k} \sin(\omega_k t) \\ U_3 &= \sum_{k=0}^6 U_3^{\omega_k} \sin(\omega_k t) \\ U_4 &= \sum_{k=0}^6 U_4^{\omega_k} \sin(\omega_k t) \end{aligned} \quad (2)$$

The (unmeasured) voltage drops  $U'_1, U'_2, U'_3, U'_4$  across the four resistors  $R_1, R_2, R_3, R_4$  respectively, are:

$$U'_1 = \sum_{k=0}^6 U_1^{\omega_k} \sin(\omega_k t) = \sum_{k=0}^6 R_1 \cdot \frac{U_1^{\omega_k}}{R_s} \sin(\omega_k t) \quad (3)$$

$$\begin{aligned}
U'_2 &= \sum_{k=0}^6 U'_2{}^{\omega_k} \sin(\omega_k t) = \sum_{k=0}^6 R_2 \cdot \frac{U_2^{\omega_k}}{R_s} \sin(\omega_k t) \\
U'_3 &= \sum_{k=0}^6 U'_3{}^{\omega_k} \sin(\omega_k t) = \sum_{k=0}^6 R_3 \cdot \frac{U_3^{\omega_k}}{R_s} \sin(\omega_k t) \\
U'_4 &= \sum_{k=0}^6 U'_4{}^{\omega_k} \sin(\omega_k t) = \sum_{k=0}^6 R_4 \cdot \frac{U_4^{\omega_k}}{R_s} \sin(\omega_k t)
\end{aligned}$$

Kirchhoff's voltage law relates Equations (1), (2) and (3). Concerning the voltage at frequency  $\omega_1$  sources between electrodes 1 and 2, across four resistors ( $R_1$ ,  $R_2$  and two sense resistors), the constraint writes as:

$$2A_1^{\omega_1} = U_1^{\omega_1} + U_2^{\omega_1} + U'_1{}^{\omega_1} + U'_2{}^{\omega_1} = U_1^{\omega_1} + U_2^{\omega_1} + (R_1 + R_2) \frac{U_1^{\omega_1}}{R_s} \quad (4)$$

Leaving all unknown resistor values on the right side of Equation (4) gives:

$$2A_1^{\omega_1} - U_1^{\omega_1} - U_2^{\omega_1} = (R_1 + R_2) \frac{U_1^{\omega_1}}{R_s} \quad (5)$$

In matrix notation, the problem writes as:

$$\frac{1}{R_s} \begin{pmatrix} U_1^{\omega_1} & U_2^{\omega_1} & U_3^{\omega_1} & U_4^{\omega_1} \\ U_1^{\omega_2} & U_2^{\omega_2} & U_3^{\omega_2} & U_4^{\omega_2} \\ U_1^{\omega_3} & U_2^{\omega_3} & U_3^{\omega_3} & U_4^{\omega_3} \\ U_1^{\omega_4} & U_2^{\omega_4} & U_3^{\omega_4} & U_4^{\omega_4} \\ U_1^{\omega_5} & U_2^{\omega_5} & U_3^{\omega_5} & U_4^{\omega_5} \\ U_1^{\omega_6} & U_2^{\omega_6} & U_3^{\omega_6} & U_4^{\omega_6} \end{pmatrix} \begin{pmatrix} R_1 \\ R_2 \\ R_3 \\ R_4 \end{pmatrix} = \begin{pmatrix} 2A_1^{\omega_1} - U_1^{\omega_1} - U_2^{\omega_1} \\ 2A_1^{\omega_2} - U_1^{\omega_2} - U_3^{\omega_2} \\ 2A_1^{\omega_3} - U_1^{\omega_3} - U_4^{\omega_3} \\ 2A_2^{\omega_4} - U_2^{\omega_4} - U_3^{\omega_4} \\ 2A_2^{\omega_5} - U_2^{\omega_5} - U_4^{\omega_5} \\ 2A_3^{\omega_6} - U_3^{\omega_6} - U_4^{\omega_6} \end{pmatrix} \quad (6)$$

This problem can be inverted: estimates of  $\begin{pmatrix} R_1 \\ R_2 \\ R_3 \\ R_4 \end{pmatrix}$  given a set of measurements and excitations.
